# Supplementary material for: Characterization of the First Alternavirus Identified in Fusarium avenaceum, the Causal Agent of Potato Dry Rot
Source: MDPI journal article supplement (doi:10.3390/v15010145), 2023-01-02
Supplement: s1 [file s1]

**Supplementary Table S1.** Primers used in this study to determine the complete genome sequence of the mycovirus, *Fusarium avenaceum alternavirus 1* (FaAV1).

| Primer name   | Sequence (5'-3')                                                 |
|---------------|------------------------------------------------------------------|
| PC3-T7 loop   | p-GGATCCCGGGAATTCGGTAATACGACTCACTATATTTTT<br>ATAGTGAGTCGTATTA-OH |
| PC2           | CCGAATTCCCGGGATCC                                                |
| RACE3 RT      | CGATCGATCATGATGCAATGCNNNNNN                                      |
| RACE3         | CGATCGATCATGATGCAATGC                                            |
| dsRNA1-3end-1 | GAAGGCGAGGTATCTATCAT                                             |
| dsRNA1-3end-2 | ATGGATAGGGTTGTGGGTCA                                             |
| dsRNA1-3end-3 | GGATAGGGTTGTGGGTCA                                               |
| dsRNA1-5end-1 | CCGACCTTAGGGTACTTG                                               |
| dsRNA1-5end-2 | GTAGCTTGAATACATCGAGGAG                                           |
| dsRNA1-5end-3 | CCAAGCTCCACGGCTCCACT                                             |
| dsRNA1-gap-1F | CGAAAGGCATAGGATTGAC                                              |
| dsRNA1-gap-1R | GAAGATGGTGAAGAGCCAGAGGAAG                                        |
| dsRNA1-gap-2F | TGTTCTCGACAGCACCTCT                                              |
| dsRNA1-gap-2R | ATCAGCGTATTCCTCAATG                                              |
| dsRNA1-gap-3F | CGACCTTAGGGTACTTGTTG                                             |
| dsRNA1-gap-3R | CTGCTAGGGTAGTGTTGTGC                                             |
| dsRNA1-gap-4F | AATCCGTGACCCACAACC                                               |
| dsRNA1-gap-4R | AGAAGGAGATGATGGCAGAG                                             |
| dsRNA2-3end-1 | GACCTGCCTGTGCGTTGGA                                              |
| dsRNA2-3end-2 | TGCCTGTGCGTTGGAAGC                                               |
| dsRNA2-3end-3 | GACACGAGTGGGACGGACTT                                             |
| dsRNA2-5end-1 | TGAAGGTCAAGTCCGTCCCA                                             |
| dsRNA2-5end-2 | TCAGAAGGTTGAGGCGAAGC                                             |
| dsRNA2-5end-3 | TGTCTGCTGCGGGAGGTT                                               |
| dsRNA2-gap-1F | GTCGTGAACGCTCGCACT                                               |

|               |                       |
|---------------|-----------------------|
| dsRNA2-gap-1R | GGAACGCAGTTGTGGAGG    |
| dsRNA2-gap-2F | GTCGTGAACGCTCGCACT    |
| dsRNA2-gap-2R | GGAACGCAGTTGTGGAGG    |
| dsRNA2-gap-3F | GGTAACACCGAACTTGACTT  |
| dsRNA2-gap-3R | TTGAACAACCTTGAGCCTGTC |
| dsRNA2-gap-4F | GCATCAGCAGCTTCTCCAT   |
| dsRNA2-gap-4R | CCAGCAGGAAAGCGACTC    |

---
